# Supplementary material for: Clinical and Humanistic Outcomes of Community Pharmacy-Based Healthcare Interventions Regarding Medication Use in Older Adults: A Systematic Review and Meta-Analysis
Source: MDPI journal article supplement (doi:10.3390/healthcare9111577), 2021-11-18
Supplement: s1 [file s1]

**Table S1.** Search Strategy.

| Databases                             | Search strategy                                                                                                                                                                                                                                                                                                       |
|---------------------------------------|-----------------------------------------------------------------------------------------------------------------------------------------------------------------------------------------------------------------------------------------------------------------------------------------------------------------------|
| Ovid Medline/Ovid Embase/APA PSY Info | 1. exp Community Pharmacy Services/ or "community pharmac*" .mp.                                                                                                                                                                                                                                                      |
|                                       | 2. "retail pharmac*" .mp. [mp=title, abstract, original title, name of substance word, subject heading word, floating sub-heading word, keyword heading word, organism supplementary concept word, protocol supplementary concept word, rare disease supplementary concept word, unique identifier, synonyms]         |
|                                       | 3. "independent pharmac*" .mp.                                                                                                                                                                                                                                                                                        |
|                                       | 4. exp Pharmacists/ or "outpatient pharmac*" .mp.                                                                                                                                                                                                                                                                     |
|                                       | 5. exp Pharmacists/                                                                                                                                                                                                                                                                                                   |
|                                       | 6. (pharmacy or pharmacies*) .mp. [mp=title, abstract, original title, name of substance word, subject heading word, floating sub-heading word, keyword heading word, organism supplementary concept word, protocol supplementary concept word, rare disease supplementary concept word, unique identifier, synonyms] |
|                                       | 7. 1 or 2 or 3 or 4 or 5 or 6                                                                                                                                                                                                                                                                                         |
|                                       | 8. exp "Delivery of Health Care"/ or strateg* .mp.                                                                                                                                                                                                                                                                    |
|                                       | 9. initiat* .mp.                                                                                                                                                                                                                                                                                                      |
|                                       | 10. exp Pharmacies/                                                                                                                                                                                                                                                                                                   |
|                                       | 11. service* .mp.                                                                                                                                                                                                                                                                                                     |
|                                       | 12. service based .mp. or exp Primary Health Care/                                                                                                                                                                                                                                                                    |
|                                       | 13. exp "Activities of Daily Living"/ or activit* .mp.                                                                                                                                                                                                                                                                |
|                                       | 14. exp Patient Reported Outcome Measures/ or exp Treatment Outcome/ or exp Outcome Assessment, Health Care/ or exp "Outcome and Process Assessment, Health Care"/ or outcome* .mp. or exp Patient Outcome Assessment/                                                                                                |
|                                       | 15. patient compliance .mp. or exp Patient Compliance/                                                                                                                                                                                                                                                                |
|                                       | 16. medication adherence .mp. or exp Patient Compliance/ or exp Medication Adherence/                                                                                                                                                                                                                                 |
|                                       | 17. concordance .mp.                                                                                                                                                                                                                                                                                                  |
|                                       | 18. exp Patient Compliance/ or patient* adherence .mp. or exp Medication Adherence/                                                                                                                                                                                                                                   |
|                                       | 19. medic* outcome .mp.                                                                                                                                                                                                                                                                                               |
|                                       | 20. 14 or 15 or 16 or 17 or 18 or 19                                                                                                                                                                                                                                                                                  |
|                                       | 21. geriatric* .mp.                                                                                                                                                                                                                                                                                                   |
|                                       | 22. exp Middle Aged/ or elder* .mp. or exp Aging/ or exp Aged/ or exp "Aged, 80 and over"/                                                                                                                                                                                                                            |
|                                       | 23. exp Aged/ or old* adult* .mp.                                                                                                                                                                                                                                                                                     |
|                                       | 24. exp Aged/ or exp "Aged, 80 and over"/ or aged 65 year* .mp. or exp Middle Aged/                                                                                                                                                                                                                                   |
|                                       | 25. community dwell* .mp.                                                                                                                                                                                                                                                                                             |
|                                       | 26. 21 or 22 or 23 or 24 or 25                                                                                                                                                                                                                                                                                        |
|                                       | 27. 8 or 9 or 10 or 11 or 12 or 13                                                                                                                                                                                                                                                                                    |
|                                       | 28. 7 and 20 and 26 and 27                                                                                                                                                                                                                                                                                            |
|                                       | 29. limit 28 to (("all aged (65 and over)" or "aged (80 and over)") and english and last 10 years)                                                                                                                                                                                                                    |
| Scopus                                | TITLE-ABS-KEY("community pharmac*" OR "retail pharmac*" OR "independent pharmac*" OR "outpatient pharmac*") AND (intervention* OR                                                                                                                                                                                     |

|        |                                                                                                                                                                                                                                                                                                                                                                                                                                                                                                                                                                                                                                                                                                                                                                                                                                                                                                                                                                                                                             |
|--------|-----------------------------------------------------------------------------------------------------------------------------------------------------------------------------------------------------------------------------------------------------------------------------------------------------------------------------------------------------------------------------------------------------------------------------------------------------------------------------------------------------------------------------------------------------------------------------------------------------------------------------------------------------------------------------------------------------------------------------------------------------------------------------------------------------------------------------------------------------------------------------------------------------------------------------------------------------------------------------------------------------------------------------|
|        | <p> strateg* OR initiati* OR activit* OR program* OR service* OR "service-based") AND ( outcome* OR "outcome assessment*" OR "treatment outcome*" OR "medication adherence" OR "patient compliance" OR "patient adherence" OR "medication compliance" OR "medication outcome" OR concordance) AND (geriatric* OR old* OR "old* adult*" OR aging OR elder* OR aged OR "aged 65 year*" OR "community dwell*") AND ( LIMIT-TO ( PUBYEAR,2021) OR LIMIT-TO ( PUBYEAR,2020) OR LIMIT-TO ( PUBYEAR,2019) OR LIMIT-TO ( PUBYEAR,2018) OR LIMIT-TO ( PUBYEAR,2017) OR LIMIT-TO ( PUBYEAR,2016) OR LIMIT-TO ( PUBYEAR,2015) OR LIMIT-TO ( PUBYEAR,2014) OR LIMIT-TO ( PUBYEAR,2013) OR LIMIT-TO ( PUBYEAR,2012) OR LIMIT-TO ( PUBYEAR,2011) OR LIMIT-TO ( PUBYEAR,2010) ) AND ( LIMIT-TO ( SUBJAREA,"MEDI" ) OR LIMIT-TO ( SUBJAREA,"PHAR" ) OR LIMIT-TO ( SUBJAREA,"NURS" ) OR LIMIT-TO ( SUBJAREA,"SOCI" ) ) AND ( LIMIT-TO ( LANGUAGE,"English" ) ) AND ( LIMIT-TO ( freetoread,"all" ) ) AND ( LIMIT-TO ( SRCTYPE , "j" ) ) </p> |
|        | <p> S11 S1 AND S2 AND S5 AND S6Limiters - Publication Year: 2010-2020<br/> Narrow by Language: - english<br/> Narrow by SubjectAge: - aged, 80 &amp; over<br/> Narrow by SubjectAge: - aged: 65+ years<br/> S10 S1 AND S2 AND S5 AND S6Narrow by Language: - english<br/> Narrow by SubjectAge: - aged, 80 &amp; over<br/> Narrow by SubjectAge: - aged: 65+ years<br/> S9 S1 AND S2 AND S5 AND S6Narrow by SubjectAge: - aged, 80 &amp; over<br/> Narrow by SubjectAge: - aged: 65+ years<br/> S8 S1 AND S2 AND S5 AND S6Narrow by SubjectAge: - aged: 65+ years<br/> S7 S1 AND S2 AND S5 AND S6<br/> S6 S3 OR S4 </p>                                                                                                                                                                                                                                                                                                                                                                                                     |
| CINAHL | <p> S5( elderly or aged or older or elder or geriatric or elderly people or old people or old people or senior ) OR ( older adults or elderly or geriatric or geriatrics or aging or senior or seniors or older people or aged 65 or 65+ ) </p> <p> S4 MH ( health outcomes or health impacts or health effects or effects on health ) OR ( "health impact*" OR "medication outcome*" OR "outcome assessment*" OR "treatment outcome*" ) </p> <p> S3 MH ( patient compliance or patient adherence ) OR MH ( medication adherence or medication compliance ) OR ( medic* compliance OR medic* adherence OR concordance OR patient adherence OR patient persistence ) </p> <p> S2 service* OR program* OR initiative* OR intervention* OR "service-based" OR activit* </p> <p> S1 MH community pharmacy services OR ( "community pharmac*" OR "outpatient pharmac*" OR "independent pharmac*" OR "retail pharmac*" </p>                                                                                                       |
